# Supplementary material
Source: PubMed Central journal article supplement (PMC3288224)
Supplement: NIHMS345584-supplement-1.pdf [file NIHMS345584-supplement-1.pdf]

**SUPPLEMENTAL MATERIAL**

**Supplemental Methods:**

**Serving Sizes of Major Protein Sources on Food Frequency Questionnaires in the Nurses' Health Study, 1980-2002**

|                                                                  | <b>1980</b> | <b>1984</b> | <b>1986</b> | <b>1990</b> | <b>1994</b> | <b>1998</b> | <b>2002</b> |
|------------------------------------------------------------------|-------------|-------------|-------------|-------------|-------------|-------------|-------------|
| <b>Skim or low fat milk</b>                                      | 8oz         | 8oz         | 8oz         | 8oz         |             |             |             |
| <b>Whole milk</b>                                                | 8oz         |
| <b>1% or 2% milk</b>                                             |             |             |             |             | 8oz         |             | 8oz         |
| <b>Skim milk</b>                                                 |             |             |             |             | 8oz         |             | 8oz         |
| <b>Skim or 1% milk</b>                                           |             |             |             |             |             | 8oz         |             |
| <b>2% milk</b>                                                   |             |             |             |             |             | 8oz         |             |
| <b>Cream</b>                                                     |             | 1 tbs       |
| <b>Sour cream</b>                                                |             | 1 tbs       |
| <b>Sherbet or ice milk or frozen yogurt or non-fat ice cream</b> |             | ½ cup       |
| <b>Yogurt</b>                                                    | 1 cup       | 1 cup       | 1 cup       | 1 cup       |             |             |             |



|                                                                                |                  |                  |                  |                  |                         |                         |                         |
|--------------------------------------------------------------------------------|------------------|------------------|------------------|------------------|-------------------------|-------------------------|-------------------------|
| <b>Hot dog</b>                                                                 | 1 hot dog               | 1 hot dog               | 1 hot dog               |
| <b>Chicken or turkey dog</b>                                                   |                  |                  |                  |                  | 1 chicken or turkey dog | 1 chicken or turkey dog | 1 chicken or turkey dog |
| <b>Processed meats</b>                                                         | 1 piece or slice        |                         |                         |
| <b>* Sandwich</b>                                                              |                  |                  |                  |                  |                         | 1 sandwich              | 1 sandwich              |
| <b>* Other (sausage, kielbasa, et)</b>                                         |                  |                  |                  |                  |                         | 2oz                     | 2oz                     |
| <b>Bacon</b>                                                                   | 2 slices                | 2 slices                | 2 slices                |
| <b>Beef, pork, lamb sandwich or mixed dish (stew, casserole, lasagna, etc)</b> | Not quantified          | Not quantified          | Not quantified          |
| <b>Beef, pork, lamb as main dish (steak, roast, ham, etc.)</b>                 | 6-8oz            | 4-6oz            | 4-6oz            |                  |                         |                         |                         |
| <b>Pork as a main dish (eg, ham or chops)</b>                                  |                  |                  |                  | 4-6oz            | 4-6oz                   | 4-6oz                   | 4-6oz                   |

|                                                                           |       |              |              |              |              |              |              |
|---------------------------------------------------------------------------|-------|--------------|--------------|--------------|--------------|--------------|--------------|
| <b>Beef or lamb as a main dish (eg, steak or roast)</b>                   |       |              |              | 4-6oz        | 4-6oz        | 4-6oz        | 4-6oz        |
| <b>Eggs</b>                                                               | 1 egg | 1 egg        | 1 egg        | 1 egg        | 1 egg        | 1 egg        | 1 egg        |
| <b>Fish</b>                                                               | 6-8oz |              |              |              |              |              |              |
| <b>* Canned tuna</b>                                                      |       | 3-4oz        | 3-4oz        | 3-4oz        | 3-4oz        | 2-3oz        | 2-3oz        |
| <b>* Dark meat fish (mackerel, salmon, sardines, bluefish, swordfish)</b> |       | 3-5oz        | 3-5oz        | 3-5oz        | 3-5oz        | 3-5oz        | 3-5oz        |
| <b>* Other fish (eg, Cod, Haddock, Halibut)</b>                           |       |              |              |              |              |              |              |
| <b>* Breaded fish cakes, pieces, or fish sticks</b>                       |       | 3-5oz        | 3-5oz        | 3-5oz        | 3-5oz        | 3-5oz        | 3-5oz        |
|                                                                           |       |              |              |              | 1 svg        | 1 svg        | 1 svg        |
| <b>Nuts (incl. peanuts,</b>                                               | 1oz   | Small packet |



**Supplemental Methods:**

**Serving Sizes of Major Protein Sources on Food Frequency Questionnaires in the Health Professionals' Follow-up Study, 1986-2006**

|                                                                  | <b>1986</b> | <b>1990</b> | <b>1994</b> | <b>1998</b> | <b>2002</b> | <b>2006</b> |
|------------------------------------------------------------------|-------------|-------------|-------------|-------------|-------------|-------------|
| <b>Skim or low fat milk or 1% milk</b>                           | 8oz         | 8oz         | 8oz         | 8oz         |             |             |
| <b>Whole milk</b>                                                | 8oz         | 8oz         | 8oz         | 8oz         | 8oz         | 8oz         |
| <b>2% milk</b>                                                   |             |             | 8oz         | 8oz         |             |             |
| <b>1% or 2% milk</b>                                             |             |             |             |             | 8oz         | 8oz         |
| <b>Skim milk</b>                                                 |             |             |             |             | 8oz         | 8oz         |
| <b>Cream</b>                                                     | 1 tbs       |
| <b>Sour cream</b>                                                | 1 tbs       | 1 tbs       |             |             |             |             |
| <b>Sherbet or ice milk or frozen yogurt or non-fat ice cream</b> | 1 cup       | ½ cup       | ½ cup       | ½ cup       | ½ cup       | 1 cup       |
| <b>Yogurt</b>                                                    | 1 cup       | 1 cup       |             |             |             |             |
| <b>Low carb, artificially sweetened, or plain yogurt</b>         |             |             | 1 cup       | 1 cup       | 1 cup       | 1 cup       |
| <b>Sweetened or flavored yogurt</b>                              |             |             | 1 cup       | 1 cup       | 1 cup       | 1 cup       |

|                                           |                       |                       |                         |                         |                         |                         |
|-------------------------------------------|-----------------------|-----------------------|-------------------------|-------------------------|-------------------------|-------------------------|
| <b>Ice cream</b>                          | 1 cup                 | ½ cup                 | ½ cup                   | ½ cup                   | ½ cup                   | ½ cup                   |
| <b>Cottage or ricotta cheese</b>          | ½ cup                 | ½ cup                 | ½ cup                   | ½ cup                   | ½ cup                   | ½ cup                   |
| <b>Hard cheese</b>                        | 1 slice or 1oz<br>svg | 1 slice or 1oz<br>svg | 1 slice or 1oz<br>svg   | 1 slice or 1oz<br>svg   | 1 slice or 1oz<br>svg   | 1 slice or 1oz<br>svg   |
| <b>Cream cheese</b>                       | 1 oz                  | 1 oz                  | 1 oz                    | 1 oz                    | 1 oz                    | 1 oz                    |
| <b>Butter</b>                             | 1 pat                 | 1 pat                 | 1 pat                   | 1 pat                   | 1 pat                   | 1 pat                   |
| <b>Chicken or turkey w/o skin</b>         | 4-6oz                 | 4-6oz                 | 4-6oz                   | 3oz                     | 3oz                     | 3oz                     |
| <b>Chicken or turkey w/skin</b>           | 4-6oz                 | 4-6oz                 | 4-6oz                   | 3oz                     | 3oz                     | 3oz                     |
| <b>Chicken or turkey sandwich</b>         |                       |                       |                         | Not quantified          | Not quantified          | Not quantified          |
| <b>Hamburger (incl. regular and lean)</b> | 1 patty               | 1 patty               | 1 patty                 | 1 patty                 | 1 patty                 | 1 patty                 |
| <b>Hot dog</b>                            | 1 hot dog             | 1 hot dog             | 1 hot dog               | 1 hot dog               | 1 hot dog               | 1 hot dog               |
| <b>Chicken or turkey dog</b>              |                       |                       | 1 chicken or turkey dog |
| <b>Processed meats<br/>* Sandwich</b>     | 1 piece or slice      | 1 piece or slice      | 1 piece or slice        | Not quantified          | Not quantified          | Not quantified          |

|                                                                                |                |                |                |                      |                      |                      |
|--------------------------------------------------------------------------------|----------------|----------------|----------------|----------------------|----------------------|----------------------|
| <b>* Other (sausage, kielbasa, et)</b>                                         |                |                |                | 2oz or 2 small links | 2oz or 2 small links | 2oz or 2 small links |
| <b>Bacon</b>                                                                   | 2 slices       | 2 slices       | 2 slices       | 2 slices             | 2 slices             | 2 slices             |
| <b>Beef, pork, lamb sandwich or mixed dish (stew, casserole, lasagna, etc)</b> | Not quantified | Not quantified | Not quantified | Not quantified       | Not quantified       | Not quantified       |
| <b>Beef, pork, lamb as main dish (steak, roast, ham, etc.)</b>                 | 4-6oz          |                |                |                      |                      |                      |
| <b>Pork as a main dish (eg, ham or chops)</b>                                  |                | 4-6 oz         | 4-6oz          | 4-6oz                | 4-6oz                | 4-6oz                |
| <b>Beef or lamb as a main dish (eg, steak or roast)</b>                        |                | 4-6 oz         | 4-6oz          | 4-6oz                | 4-6oz                | 4-6oz                |
| <b>Eggs</b>                                                                    | 1 egg          | 1 egg          | 1 egg          | 1 egg                | 1 egg                | 1 egg                |
| <b>Fish</b>                                                                    |                |                |                |                      |                      |                      |
| <b>* Canned tuna</b>                                                           | 3-4oz          | 3-4oz          | 3-4oz          | 3-4oz                | 3-4oz                | 3-4oz                |
| <b>* Dark meat fish (mackerel, salmon, sardines, bluefish,</b>                 | 3-5oz          | 3-5oz          | 3-5oz          | 3-5oz                | 3-5oz                | 3-5oz                |

|                                                     |                     |                     |                     |                     |                     |                     |
|-----------------------------------------------------|---------------------|---------------------|---------------------|---------------------|---------------------|---------------------|
| <b>swordfish)</b>                                   |                     |                     |                     |                     |                     |                     |
| <b>* Other fish (eg, Cod, Haddock, Halibut)</b>     | 3-5 oz              | 3-5oz               | 3-5oz               | 3-5oz               | 3-5oz               | 3-5oz               |
| <b>* Breaded fish cakes, pieces, or fish sticks</b> |                     |                     |                     | 1 svg               | 1 svg               | 1 svg               |
| <b>Nuts (incl. peanuts, walnuts, other nuts)</b>    | Small packet or 1oz |
| <b>Beans or lentils, baked or dry</b>               | ½ cup               |
| <b>String beans</b>                                 | ½ cup               |
| <b>Peas</b>                                         | ½ cup               |
| <b>Soybeans or tofu</b>                             | 3-4 oz              | 3-4 oz              | 3-4 oz              | 3-4 oz              |                     |                     |
| <b>Tofu, soy burger, or other soy protein</b>       |                     |                     |                     |                     | Not quantified      | Not quantified      |

**Supplemental Methods:**

Many previous prospective cohort studies have stopped updating a study participant's diet when he or she developed an intermediate outcome on the causal pathway between diet and cardiovascular disease, such as diabetes, hypertension, hypercholesterolemia, angina, or coronary artery bypass surgery (CABG)/percutaneous coronary intervention (PCI). This has been done because changes in diet after these interim diagnoses or events may bias the diet-disease association; i.e., these diagnoses can be confounders. Rather than stop updating diet at all of these intermediates, we first assessed whether the occurrence of an intermediate outcome or event was associated with change in dietary protein intake. To do so, we fit multiple generalized linear models accounting for within-person repeated dietary measures. Three models were fit with data from the Nurses' Health Study and three were fit with data from the Health Professionals' Follow-Up Study. Within each Study, one model had as its continuous dependent variable the change in calorie-adjusted animal protein intake at each point in time (e.g., the "change" in animal protein intake in 1986 in the NHS was the calorie-adjusted 1984 intake subtracted from the calorie-adjusted 1990 intake), another model had as its continuous dependent variable the change in calorie-adjusted vegetable protein intake (defined in the same way as for animal protein), and a third model had as its outcome the change in calorie-adjusted red meat intake. The independent variables for each of the six models included binary indicators for a new diagnosis of each intermediate (yes/no for diabetes, hypertension, hypercholesterolemia, angina, or CABG/PCI), a binary indicator for a new diagnosis of cancer (yes/no), a binary indicator for a new diagnosis of myocardial infarction (yes/no), an indicator for the current follow-up cycle (ten 2-year follow-up cycles between 1986 and 2006), and interaction terms between the intermediate outcomes or cancer or myocardial infarction and the follow-up cycle. The correlation structure for the generalized linear models was autoregressive. From these models, we observed that new diagnoses of high cholesterol, high blood pressure, angina, and PCI/CABG were associated with statistically significant but very small changes in subsequent animal and vegetable protein intake (e.g., 0.1 to 1.2 g/day following diagnosis) and red meat intake (e.g., 0.01 to 0.1 servings/day following diagnosis) in men and women. As these diagnoses appeared to be only weak time-dependent confounders, and to avoid the potential for misclassification of each participant's long-term diet by stopping the updating of diet at one of these diagnoses, we continued updating a study participant's dietary intake throughout follow-up using data from all repeated FFQs.





**Table S3. RR and 95% CI for stroke by quintiles of intake of processed and unprocessed red meat <sup>\*,†,‡</sup>**

|                             |                     | Quintiles |                     |                     |                     |                     | P for trend | RR for 1 serving/day |
|-----------------------------|---------------------|-----------|---------------------|---------------------|---------------------|---------------------|-------------|----------------------|
|                             |                     | 1st       | 2nd                 | 3rd                 | 4th                 | 5th                 |             |                      |
| <b>Total Red Meat</b>       |                     |           |                     |                     |                     |                     |             |                      |
| <b>Men</b>                  | Multivariable model | 1.00      | 0.97<br>(0.81,1.17) | 1.07<br>(0.88,1.30) | 1.20<br>(0.98,1.48) | 1.25<br>(1.00,1.58) | 0.02        | 1.14<br>(1.02,1.26)  |
| <b>Women</b>                | Multivariable model | 1.00      | 1.09<br>(0.97,1.23) | 1.08<br>(0.94,1.23) | 1.11<br>(0.95,1.28) | 1.12<br>(0.94,1.33) | 0.28        | 1.06<br>(0.95,1.19)  |
|                             | Pooled              | 1.00      | 1.05<br>(0.95,1.17) | 1.08<br>(0.96,1.20) | 1.14<br>(1.01,1.29) | 1.17<br>(1.02,1.34) | 0.01        | 1.10<br>(1.02,1.19)  |
| <b>Processed Red Meat</b>   |                     |           |                     |                     |                     |                     |             |                      |
| <b>Men</b>                  | Multivariable model | 1.00      | 0.98<br>(0.82,1.19) | 0.89<br>(0.73,1.08) | 1.09<br>(0.89,1.32) | 1.23<br>(1.00,1.51) | <0.01       | 1.48<br>(1.13,1.95)  |
| <b>Women</b>                | Multivariable model | 1.00      | 0.96<br>(0.85,1.08) | 1.03<br>(0.91,1.18) | 1.04<br>(0.91,1.18) | 1.03<br>(0.89,1.19) | 0.53        | 1.08<br>(0.86,1.35)  |
|                             | Pooled              | 1.00      | 0.97<br>(0.87,1.07) | 0.99<br>(0.89,1.10) | 1.05<br>(0.94,1.17) | 1.09<br>(0.97,1.23) | 0.02        | 1.23<br>(1.03,1.46)  |
| <b>Unprocessed Red Meat</b> |                     |           |                     |                     |                     |                     |             |                      |
| <b>Men</b>                  | Multivariable model | 1.00      | 1.09<br>(0.91,1.31) | 1.05<br>(0.86,1.28) | 1.22<br>(0.99,1.50) | 1.10<br>(0.87,1.38) | 0.56        | 1.07<br>(0.86,1.33)  |

|              |                     |      |                     |                     |                     |                     |      |                     |
|--------------|---------------------|------|---------------------|---------------------|---------------------|---------------------|------|---------------------|
| <b>Women</b> | Multivariable model | 1.00 | 1.07<br>(0.95,1.21) | 1.03<br>(0.90,1.17) | 1.11<br>(0.96,1.28) | 1.16<br>(0.99,1.37) | 0.07 | 1.19<br>(0.98,1.43) |
|              | Pooled              | 1.00 | 1.08<br>(0.97,1.19) | 1.04<br>(0.93,1.16) | 1.14<br>(1.02,1.28) | 1.14<br>(1.00,1.30) | 0.08 | 1.14<br>(0.98,1.31) |

\* Median values shown for quintiles of servings/day

† Multivariable model stratified on age (months) and time period (13 periods in NHS, 11 in HPFS) and includes: body mass index (10 categories), cigarette smoking (never, past, current 1-14 cig/day, current 14-25 cig/day, current 25+ cig/day), physical exercise (<3, 3-9, 9-18, 18-27, 27+ metabolic equivalents/week), parental history of early myocardial infarction (before age 60), menopausal status in women (pre-menopausal, postmenopausal with no history of hormone replacement, postmenopausal with history of hormone replacement, postmenopausal with current hormone replacement), multivitamin use (quintiles of yrs), vitamin E supplement use (yes/no), aspirin use at least once per week (yes/no), total energy (quintiles of Kcal), cereal fiber (quintiles of g/day), alcohol (quintiles of g/day), trans-fat (quintiles of g/day), fruit and vegetables (quintiles of servings/day), other protein sources (quintiles of servings/day), and history of myocardial infarction (yes/no), coronary artery bypass surgery or percutaneous coronary intervention (yes/no), angina (yes/no), diabetes (yes/no), hypertension (yes/no), and hypercholesterolemia (yes/no)

‡ Q statistic p value for between-study heterogeneity (null hypothesis is that *there is no* heterogeneity) for total red meat, processed meat, unprocessed meat > 0.05

**Table S4: Relative Risks (RR) and 95% confidence intervals for hemorrhagic stroke in men and women by quintiles of intake of major sources of dietary protein \***

|                             |              | Quintiles |                     |                     |                     |                     | P for trend | RR for 1 serving/day |
|-----------------------------|--------------|-----------|---------------------|---------------------|---------------------|---------------------|-------------|----------------------|
|                             |              | 1st       | 2nd                 | 3rd                 | 4th                 | 5th                 |             |                      |
| <b>Total Red Meat</b>       |              |           |                     |                     |                     |                     |             |                      |
|                             | <b>Men</b>   | 1.00      | 1.03<br>(0.61,1.73) | 0.93<br>(0.53,1.63) | 1.14<br>(0.63,2.06) | 1.07<br>(0.55,2.08) | 0.61        | 1.08 (0.80,1.48)     |
|                             | <b>Women</b> | 1.00      | 1.46<br>(0.97,2.22) | 1.49<br>(0.94,2.34) | 1.54<br>(0.94,2.51) | 1.30<br>(0.72,2.34) | 0.56        | 1.11 (0.78,1.60)     |
| <b>Processed Red Meat</b>   |              |           |                     |                     |                     |                     |             |                      |
|                             | <b>Men</b>   | 1.00      | 0.95<br>(0.55,1.67) | 1.04<br>(0.59,1.84) | 1.26<br>(0.72,2.21) | 1.47<br>(0.80,2.72) | 0.08        | 2.06 (0.92,4.62)     |
|                             | <b>Women</b> | 1.00      | 1.12<br>(0.74,1.68) | 1.09<br>(0.70,1.71) | 1.48<br>(0.97,2.27) | 0.94<br>(0.56,1.57) | 0.96        | 0.98 (0.46,2.09)     |
| <b>Unprocessed Red Meat</b> |              |           |                     |                     |                     |                     |             |                      |
|                             | <b>Men</b>   | 1.00      | 0.72<br>(0.42,1.22) | 1.09<br>(0.65,1.83) | 0.60<br>(0.32,1.12) | 0.70<br>(0.36,1.37) | 0.35        | 0.73 (0.39,1.40)     |
|                             | <b>Women</b> | 1.00      | 1.12<br>(0.74,1.69) | 0.94<br>(0.60,1.49) | 1.39<br>(0.88,2.18) | 0.93<br>(0.54,1.60) | 0.92        | 1.03 (0.56,1.91)     |
| <b>Poultry</b>              |              |           |                     |                     |                     |                     |             |                      |
|                             | <b>Men</b>   | 1.00      | 0.87<br>(0.53,1.44) | 0.93<br>(0.57,1.51) | 0.93<br>(0.53,1.64) | 0.66<br>(0.37,1.18) | 0.19        | 0.55 (0.22,1.36)     |
|                             | <b>Women</b> | 1.00      | 0.74<br>(0.48,1.15) | 0.87<br>(0.59,1.30) | 0.71<br>(0.45,1.10) | 0.79<br>(0.51,1.24) | 0.45        | 0.67 (0.24,1.89)     |

**Fish**

|              |      |                     |                     |                     |                     |      |                  |
|--------------|------|---------------------|---------------------|---------------------|---------------------|------|------------------|
| <b>Men</b>   | 1.00 | 1.18<br>(0.72,1.94) | 0.92<br>(0.53,1.61) | 0.88<br>(0.50,1.55) | 1.08<br>(0.60,1.94) | 0.89 | 0.94 (0.37,2.40) |
| <b>Women</b> | 1.00 | 0.61<br>(0.40,0.92) | 0.61<br>(0.40,0.93) | 0.63<br>(0.41,0.96) | 0.65<br>(0.41,1.02) | 0.21 | 0.47 (0.14,1.53) |

**Whole-fat dairy**

|              |      |                     |                     |                     |                     |      |                  |
|--------------|------|---------------------|---------------------|---------------------|---------------------|------|------------------|
| <b>Men</b>   | 1.00 | 0.69<br>(0.41,1.17) | 0.77<br>(0.46,1.30) | 0.85<br>(0.51,1.43) | 0.65<br>(0.36,1.15) | 0.46 | 0.92 (0.73,1.15) |
| <b>Women</b> | 1.00 | 0.78<br>(0.52,1.18) | 0.91<br>(0.60,1.37) | 0.73<br>(0.46,1.14) | 1.23<br>(0.80,1.88) | 0.10 | 1.15 (0.97,1.35) |

**Low-fat dairy**

|              |      |                     |                     |                     |                     |      |                  |
|--------------|------|---------------------|---------------------|---------------------|---------------------|------|------------------|
| <b>Men</b>   | 1.00 | 0.93<br>(0.55,1.57) | 0.90<br>(0.53,1.52) | 0.63<br>(0.36,1.11) | 1.10<br>(0.65,1.85) | 0.55 | 1.06 (0.88,1.28) |
| <b>Women</b> | 1.00 | 0.69<br>(0.45,1.05) | 0.74<br>(0.49,1.14) | 0.89<br>(0.58,1.36) | 0.73<br>(0.45,1.16) | 0.53 | 0.93 (0.76,1.15) |

**Eggs**

|              |      |                     |                     |                     |                     |      |                  |
|--------------|------|---------------------|---------------------|---------------------|---------------------|------|------------------|
| <b>Men</b>   | 1.00 | 1.39<br>(0.76,2.55) | 2.05<br>(1.15,3.62) | 1.55<br>(0.86,2.79) | 0.53<br>(0.22,1.25) | 0.05 | 0.48 (0.23,1.01) |
| <b>Women</b> | 1.00 | 0.98<br>(0.67,1.45) | 1.17<br>(0.79,1.73) | 0.98<br>(0.63,1.52) | 0.76<br>(0.47,1.23) | 0.22 | 0.64 (0.31,1.30) |

**Nuts**

|              |      |                     |                     |                     |                     |      |                  |
|--------------|------|---------------------|---------------------|---------------------|---------------------|------|------------------|
| <b>Men</b>   | 1.00 | 0.76<br>(0.45,1.28) | 0.84<br>(0.50,1.41) | 0.93<br>(0.57,1.52) | 0.79<br>(0.47,1.31) | 0.51 | 0.77 (0.35,1.67) |
| <b>Women</b> | 1.00 | 1.24<br>(0.84,1.85) | 0.78<br>(0.49,1.22) | 0.80<br>(0.51,1.27) | 0.86<br>(0.55,1.35) | 0.20 | 0.46 (0.14,1.50) |

**Legumes**

|              |      |                     |                     |                     |                     |      |                  |
|--------------|------|---------------------|---------------------|---------------------|---------------------|------|------------------|
| <b>Men</b>   | 1.00 | 0.84<br>(0.49,1.45) | 1.18<br>(0.71,1.96) | 0.88<br>(0.51,1.53) | 1.29<br>(1.75,2.20) | 0.28 | 1.72 (0.65,4.58) |
| <b>Women</b> | 1.00 | 0.80<br>(0.52,1.24) | 1.31<br>(0.85,2.01) | 0.96<br>(0.63,1.47) | 1.07<br>(0.69,1.66) | 0.80 | 1.16 (0.37,3.63) |

\* Multivariable model stratified on age (months) and time period (13 periods in NHS, 11 in HPFS) and includes: body mass index (10 categories), cigarette smoking (never, past, current 1-14 cig/day, current 14-25 cig/day, current 25+ cig/day), physical exercise (<3, 3-9, 9-18, 18-27, 27+ metabolic equivalents/week), parental history of early myocardial infarction (before age 60), menopausal status in women (pre-menopausal, postmenopausal with no history of hormone replacement, postmenopausal with history of hormone replacement, postmenopausal with current hormone replacement), multivitamin use (quintiles of yrs), vitamin E supplement use (yes/no), aspirin use at least once per week (yes/no), total energy (quintiles of Kcal), cereal fiber (quintiles of g/day), alcohol (quintiles of g/day), trans-fat (quintiles of g/day), fruit and vegetables (quintiles of servings/day), and other protein sources (quintiles of servings/day)

**Table S5: Relative Risks (RR) and 95% confidence intervals for ischemic stroke in men and women by quintiles of intake of major sources of dietary protein \***

|                             |              | Quintiles |                     |                     |                     |                     | P for trend | RR for 1 serving/day |
|-----------------------------|--------------|-----------|---------------------|---------------------|---------------------|---------------------|-------------|----------------------|
|                             |              | 1st       | 2nd                 | 3rd                 | 4th                 | 5th                 |             |                      |
| <b>Total Red Meat</b>       |              |           |                     |                     |                     |                     |             |                      |
|                             | <b>Men</b>   | 1.00      | 1.03<br>(0.81,1.31) | 1.09<br>(0.85,1.41) | 1.34<br>(1.03,1.75) | 1.31<br>(0.97,1.77) | 0.06        | 1.14 (0.99,1.32)     |
|                             | <b>Women</b> | 1.00      | 1.09<br>(0.92,1.29) | 1.09<br>(0.91,1.31) | 1.10<br>(0.90,1.35) | 1.16<br>(0.92,1.48) | 0.27        | 1.09 (0.93,1.27)     |
| <b>Processed Red Meat</b>   |              |           |                     |                     |                     |                     |             |                      |
|                             | <b>Men</b>   | 1.00      | 1.07<br>(0.84,1.36) | 0.87<br>(0.67,1.12) | 1.10<br>(0.85,1.42) | 1.31<br>(1.00,1.71) | 0.01        | 1.59 (1.11,2.27)     |
|                             | <b>Women</b> | 1.00      | 0.98<br>(0.83,1.16) | 1.06<br>(0.89,1.27) | 0.98<br>(0.82,1.18) | 1.07<br>(0.87,1.31) | 0.54        | 1.10 (0.80,1.52)     |
| <b>Unprocessed Red Meat</b> |              |           |                     |                     |                     |                     |             |                      |
|                             | <b>Men</b>   | 1.00      | 1.26<br>(0.99,1.60) | 1.08<br>(0.84,1.40) | 1.49<br>(1.14,1.94) | 1.23<br>(0.91,1.67) | 0.33        | 1.15 (0.86,1.53)     |
|                             | <b>Women</b> | 1.00      | 1.20<br>(1.01,1.43) | 1.18<br>(0.98,1.42) | 1.16<br>(0.95,1.42) | 1.30<br>(1.03,1.63) | 0.08        | 1.26 (0.97,1.64)     |
| <b>Poultry</b>              |              |           |                     |                     |                     |                     |             |                      |
|                             | <b>Men</b>   | 1.00      | 1.10<br>(0.88,1.38) | 0.94<br>(0.75,1.18) | 1.14<br>(0.89,1.46) | 1.07<br>(0.84,1.37) | 0.74        | 1.07 (0.72,1.58)     |
|                             | <b>Women</b> | 1.00      | 0.96<br>(0.80,1.15) | 0.88<br>(0.74,1.04) | 0.92<br>(0.76,1.10) | 0.78<br>(0.64,0.95) | 0.02        | 0.61 (0.39,0.94)     |

**Fish**

|              |      |                     |                     |                     |                     |      |                  |
|--------------|------|---------------------|---------------------|---------------------|---------------------|------|------------------|
| <b>Men</b>   | 1.00 | 0.91<br>(0.73,1.13) | 0.90<br>(0.71,1.15) | 0.92<br>(0.73,1.17) | 0.96<br>(0.74,1.23) | 0.96 | 0.99 (0.66,1.49) |
| <b>Women</b> | 1.00 | 1.03<br>(0.86,1.23) | 0.98<br>(0.82,1.19) | 1.09<br>(0.90,1.31) | 0.94<br>(0.76,1.15) | 0.54 | 0.86 (0.53,1.39) |

**Whole-fat dairy**

|              |      |                     |                     |                     |                     |      |                  |
|--------------|------|---------------------|---------------------|---------------------|---------------------|------|------------------|
| <b>Men</b>   | 1.00 | 0.85<br>(0.68,1.07) | 0.86<br>(0.68,1.09) | 0.98<br>(0.78,1.25) | 0.92<br>(0.72,1.19) | 0.92 | 0.99 (0.90,1.10) |
| <b>Women</b> | 1.00 | 0.93<br>(0.79,1.09) | 0.87<br>(0.73,1.03) | 0.83<br>(0.69,0.99) | 0.85<br>(0.70,1.03) | 0.12 | 0.94 (0.88,1.01) |

**Low-fat dairy**

|              |      |                     |                     |                     |                     |      |                  |
|--------------|------|---------------------|---------------------|---------------------|---------------------|------|------------------|
| <b>Men</b>   | 1.00 | 0.88<br>(0.69,1.11) | 0.97<br>(0.78,1.22) | 0.92<br>(0.73,1.16) | 0.96<br>(0.76,1.22) | 0.83 | 0.99 (0.91,1.08) |
| <b>Women</b> | 1.00 | 0.94<br>(0.78,1.12) | 0.98<br>(0.81,1.18) | 0.95<br>(0.79,1.15) | 0.93<br>(0.76,1.13) | 0.54 | 0.97 (0.89,1.06) |

**Eggs**

|              |      |                     |                     |                     |                     |      |                  |
|--------------|------|---------------------|---------------------|---------------------|---------------------|------|------------------|
| <b>Men</b>   | 1.00 | 0.74<br>(0.58,0.93) | 0.75<br>(0.59,0.94) | 0.67<br>(0.53,0.85) | 0.79<br>(0.61,1.04) | 0.34 | 0.86 (0.63,1.17) |
| <b>Women</b> | 1.00 | 0.89<br>(0.75,1.04) | 0.92<br>(0.78,1.08) | 0.90<br>(0.74,1.08) | 0.95<br>(0.79,1.14) | 0.72 | 0.95 (0.71,1.27) |

**Nuts**

|              |      |                     |                     |                     |                     |      |                  |
|--------------|------|---------------------|---------------------|---------------------|---------------------|------|------------------|
| <b>Men</b>   | 1.00 | 1.04<br>(0.83,1.31) | 1.02<br>(0.81,1.28) | 1.06<br>(0.85,1.32) | 0.97<br>(0.77,1.22) | 0.51 | 0.89 (0.63,1.26) |
| <b>Women</b> | 1.00 | 0.92<br>(0.77,1.10) | 0.98<br>(0.81,1.18) | 1.01<br>(0.84,1.21) | 0.96<br>(0.80,1.16) | 0.98 | 0.99 (0.63,1.57) |

**Legumes**

|              |      |                     |                     |                     |                     |      |                  |
|--------------|------|---------------------|---------------------|---------------------|---------------------|------|------------------|
| <b>Men</b>   | 1.00 | 0.93<br>(0.74,1.16) | 0.89<br>(0.70,1.12) | 1.03<br>(0.82,1.30) | 1.11<br>(0.88,1.41) | 0.09 | 1.45 (0.94,2.24) |
| <b>Women</b> | 1.00 | 0.98<br>(0.82,1.18) | 1.14<br>(0.95,1.37) | 1.04<br>(0.87,1.25) | 1.16<br>(0.96,1.40) | 0.12 | 1.45 (0.91,2.33) |

\* Multivariable model stratified on age (months) and time period (13 periods in NHS, 11 in HPFS) and includes: body mass index (10 categories), cigarette smoking (never, past, current 1-14 cig/day, current 14-25 cig/day, current 25+ cig/day), physical exercise (<3, 3-9, 9-18, 18-27, 27+ metabolic equivalents/week), parental history of early myocardial infarction (before age 60), menopausal status in women (pre-menopausal, postmenopausal with no history of hormone replacement, postmenopausal with history of hormone replacement, postmenopausal with current hormone replacement), multivitamin use (quintiles of yrs), vitamin E supplement use (yes/no), aspirin use at least once per week (yes/no), total energy (quintiles of Kcal), cereal fiber (quintiles of g/day), alcohol (quintiles of g/day), trans-fat (quintiles of g/day), fruit and vegetables (quintiles of servings/day), and other protein sources (quintiles of servings/day)
